# Supplementary material for: AIn4S6Cl (A = Rb and Cs) and Pb5Sn3Q10Cl2 (Q = S and Se): quaternary chalcohalides with mixed anionic coordination exhibit photocurrent responses
Source: Royal Society of Chemistry journal article supplement (doi:10.1039/d2dt00350c), 2022-01-01
Supplement: d2dt00350c1.pdf [file d2dt00350c1.pdf]

## Supporting Information

### **AIn<sub>4</sub>S<sub>6</sub>Cl (A = Rb, Cs) and Pb<sub>5</sub>Sn<sub>3</sub>Q<sub>10</sub>Cl<sub>2</sub> (Q = S, Se): Quaternary Chalcogenides with Mixed Anionic Coordination Exhibit Photocurrent Responses**

Lin-Tao Jiang,<sup>a, b</sup> Ming-Ze Li,<sup>a, b</sup> Xiao-Ming Jiang,<sup>b, c,\*</sup> Bin-Wen Liu,<sup>b, c</sup> and Guo-Cong Guo<sup>b, c, \*</sup>

<sup>a</sup> College of Chemistry, Fuzhou University, Fuzhou, Fujian 350116, P. R. China

<sup>b</sup> State Key Laboratory of Structural Chemistry, Fujian Institute of Research on the Structure of Matter, Chinese Academy of Sciences, Fuzhou, Fujian 350002, P. R. China

<sup>c</sup> Fujian Science & Technology Innovation Laboratory for Optoelectronic Information of China, Fuzhou, Fujian 350108, P. R. China

#### **CONTENTS**

##### **1. Figures**

**Figure S1.** Powder XRD patterns of compounds **1(a)**, **2(b)**, **3(c)** and **4(d)**.

**Figure S2.** EDX spectra of **1 (a)**, **2 (b)**, **3 (c)** and **2 (d)**.

**Figure S3.** IR spectra of **1 (a)**, **2 (b)**, **3 (c)** and **2 (d)**.

**Figure S4.** Coordination environments of Rb (a) and Cs (b) atoms in compounds **1** and **2** with distances (Å) near the ionic interactions (dotted lines).

**Figure S5.** (a) Coordination environments of Sn and Pb atoms in compound **3** with bond lengths (Å) near the covalent bonds. (b) A [Pb<sub>4</sub>SnS<sub>16</sub>Cl<sub>8</sub>]<sup>28-</sup> polyhedral unit.

**Figure S6.** On-Off I-V curves of **1-4** with and without Xenon lamp irradiation.

## 2. Tables

**Table S1.** Fractional atomic coordinates ( $\times 10^4$ ), equivalent isotropic displacement parameters ( $\text{\AA}^2 \times 10^3$ ), formal oxidation states (FOS) and bond valence sum (BVS) of all atoms in **1-4**.

**Table S2.** Selected bond lengths ( $\text{\AA}$ ) of **1-4**.

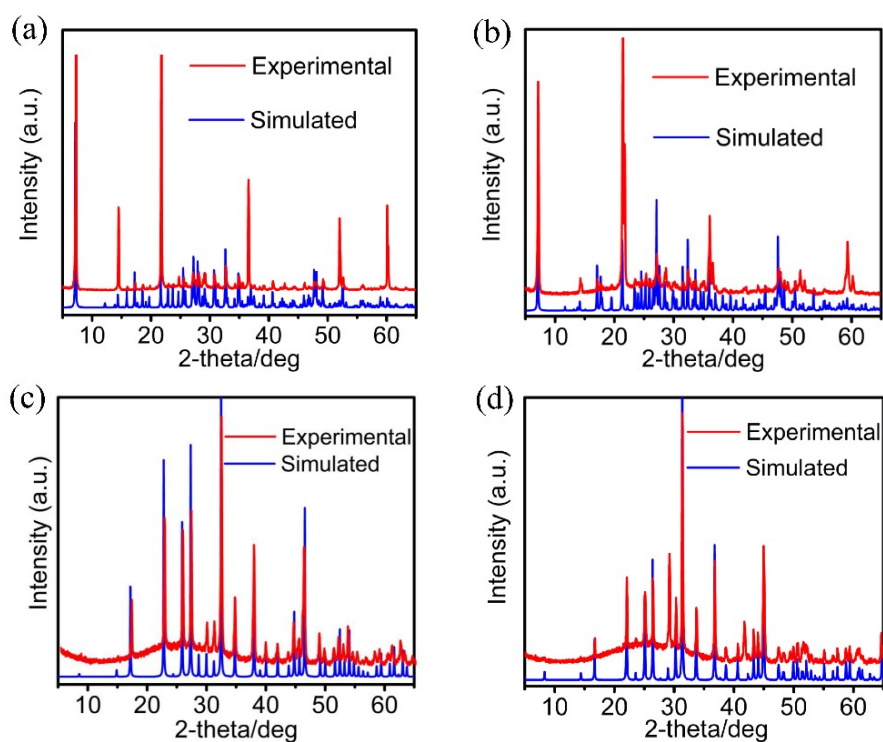

**Figure S1.** Powder XRD patterns of **1** (a), **2** (b), **3** (c) and **4** (d). Samples of **1** and **2** are flake-like crystals, and samples of **3** and **4** are needle-like crystals. Intensities of some peaks on the experimental patterns don't match those on the simulated ones because of the effect of preferred orientation.

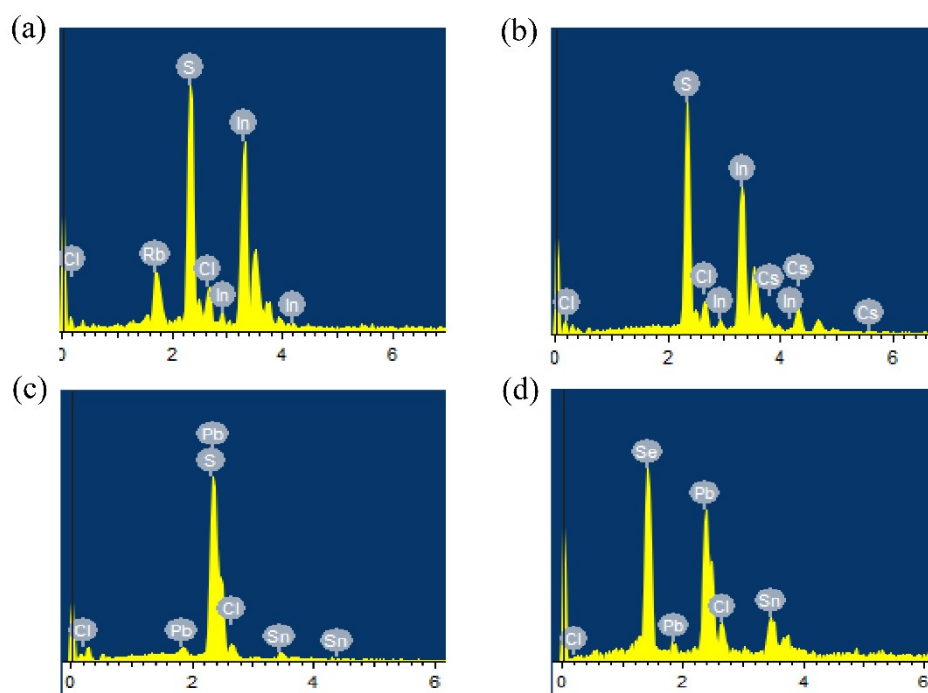

**Figure S2.** EDX spectra of **1** (a), **2** (b), **3** (c) and **4** (d).

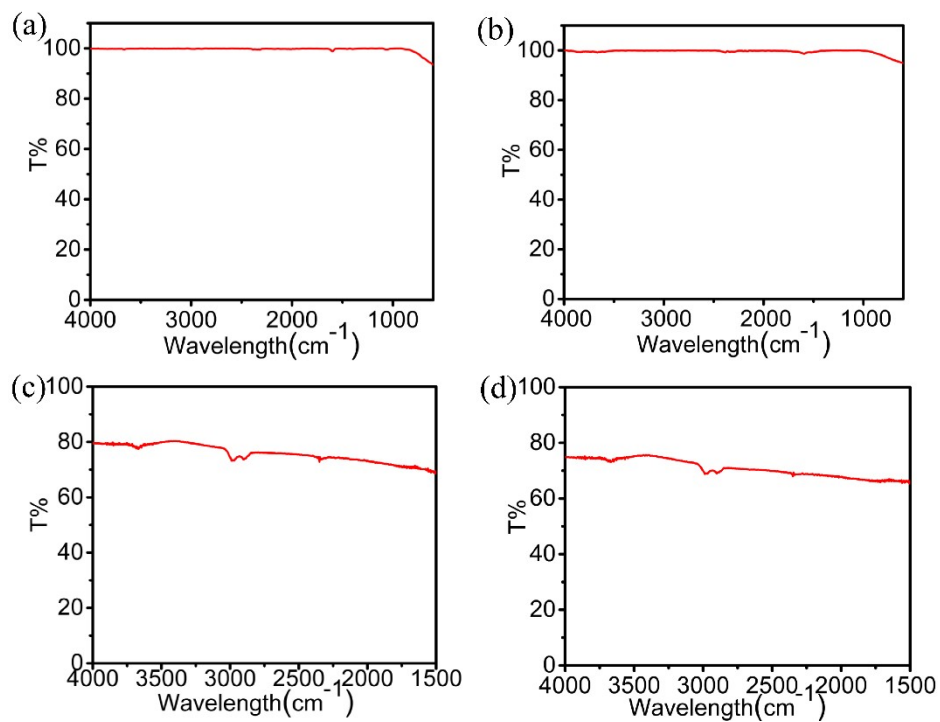

**Figure S3.** IR spectra of **1** (a), **2** (b), **3** (c) and **4** (d).

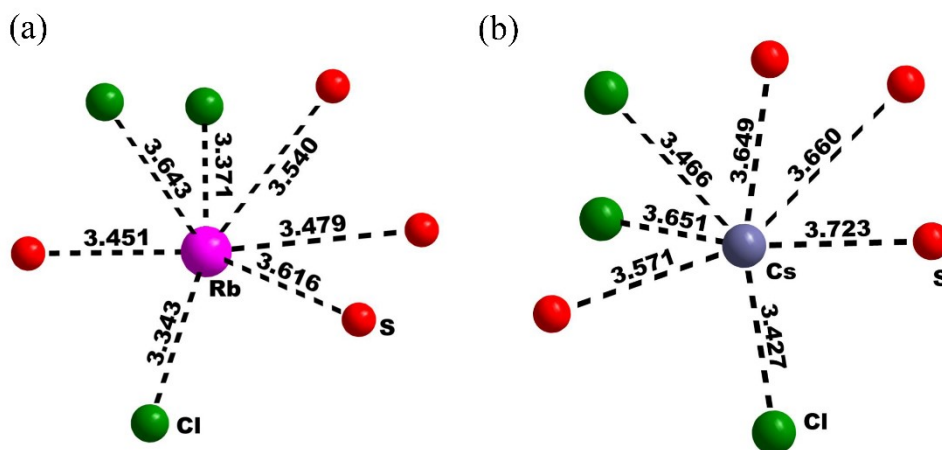

**Figure S4.** Coordination environments of Rb (a) and Cs (b) atoms in compounds **1** and **2** with distances (Å) near the ionic interactions (dotted lines).

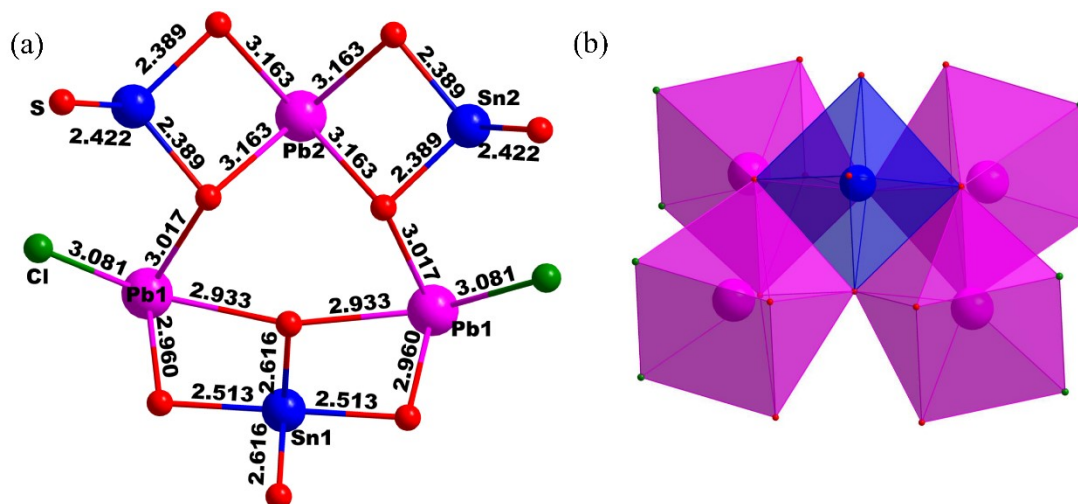

**Figure S5.** (a) Coordination environments of Sn and Pb atoms in compound **3** with bond lengths (Å) near the covalent bonds. (b) A  $[\text{Pb}_4\text{SnS}_{16}\text{Cl}_8]^{28-}$  polyhedral unit.

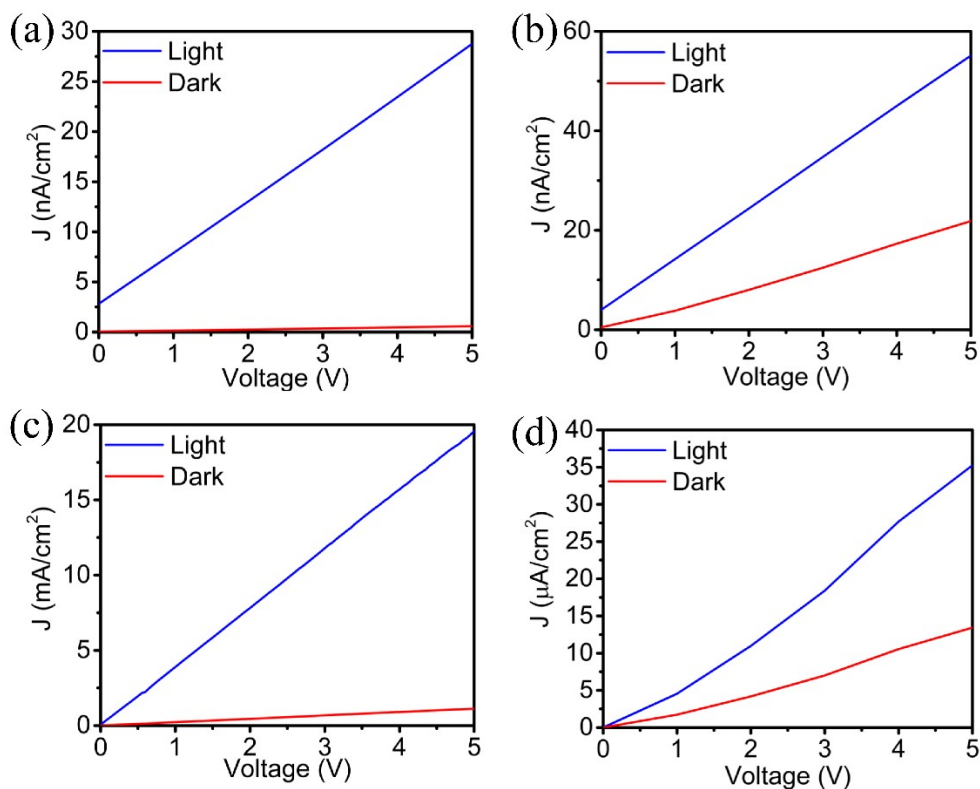

**Figure S6.** On-Off I-V curves of **1-4** with and without Xenon lamp irradiation.

**Table S1.** Fractional atomic coordinates ( $\times 10^4$ ), equivalent isotropic displacement parameters ( $\text{\AA}^2 \times 10^3$ ), formal oxidation states (FOS) and bond valence sum (BVS) of all atoms in **1-4**.

| <b>1</b> |            |            |            |                |     |        |
|----------|------------|------------|------------|----------------|-----|--------|
| Atom     | $x$        | $y$        | $z$        | $U(\text{eq})$ | FOS | BVS    |
| Rb1      | 4066.5(1)  | -2616.2(6) | -1387.8(1) | 45.3(5)        | 1   | 0.806  |
| In1      | 905.8(1)   | 648.1(3)   | 6281.8(9)  | 16.3(3)        | 3   | 3.087  |
| In2      | -849.8(1)  | -1358.0(3) | -1291.6(9) | 17.4(3)        | 3   | 3.195  |
| In3      | 5741.1(1)  | 660.8(3)   | 8762.3(1)  | 16.7(3)        | 3   | 3.067  |
| In4      | -4099.5(1) | 672.8(3)   | 3777.7(1)  | 17.4(3)        | 3   | 3.044  |
| S1       | -4128(4)   | -1193.0(1) | 3771(3)    | 15.4(6)        | -2  | -1.984 |
| S2       | -2407(3)   | 21.4(1)    | 6164(3)    | 16.6(6)        | -2  | -1.891 |

|     |          |            |          |         |    |        |
|-----|----------|------------|----------|---------|----|--------|
| S3  | -4499(4) | -1268.0(1) | -1272(3) | 16.7(6) | -2 | -2.189 |
| S4  | 2773(4)  | -15.9(1)   | 8623(3)  | 15.0(6) | -2 | -1.920 |
| S5  | 991(4)   | -1221.1(1) | 1441(3)  | 17.1(6) | -2 | -2.158 |
| S6  | 930(4)   | -1275.5(1) | -4035(3) | 17.4(7) | -2 | -2.150 |
| Cl1 | 911(4)   | 2375.8(1)  | 11188(4) | 35.9(9) | -1 | -0.908 |

---

**2**

---

| Atom | <i>x</i>  | <i>y</i>  | <i>z</i>  | <i>U</i> (eq) | FOS | BVS    |
|------|-----------|-----------|-----------|---------------|-----|--------|
| Cs1  | 2109(2)   | 4002 (2)  | 2413.0(5) | 34.7(4)       | 1   | 0.957  |
| In1  | 1449.3(1) | 4018.6(1) | 645.5(5)  | 15.2(3)       | 3   | 3.006  |
| In2  | 6642.3(1) | 4143.8(1) | 1339.1(5) | 16.4(3)       | 3   | 3.202  |
| In3  | 8936.1(1) | 9093.7(1) | 656.3(5)  | 15.5(4)       | 3   | 3.050  |
| In4  | 3919.3(1) | 9258.8(1) | 654.1(5)  | 15.5(4)       | 3   | 3.042  |
| S1   | 1514(5)   | 844(6)    | 1181.4(1) | 12.9(8)       | -2  | -1.971 |
| S2   | 3886(5)   | 5976(6)   | 1206.0(1) | 14.6(8)       | -2  | -2.184 |
| S3   | 9353(6)   | 5943(6)   | 1259.1(1) | 16.1(9)       | -2  | -1.871 |
| S4   | 3635(5)   | 2232(6)   | 9988.9(1) | 12.9(8)       | -2  | -1.903 |
| S5   | 8828(5)   | 2586(6)   | 9979.1(1) | 14.3(8)       | -2  | -2.127 |
| S6   | 6596(5)   | 513(6)    | 1242.0(1) | 12.7(8)       | -2  | -2.232 |
| Cl1  | 6888(7)   | 4033(7)   | 2349.4(1) | 28.8(1)       | -1  | -0.970 |

---

**3**

---

| Atom | <i>x</i>  | <i>y</i>  | <i>z</i> | <i>U</i> (eq) | FOS | BVS    |
|------|-----------|-----------|----------|---------------|-----|--------|
| Pb1  | 3593.9(3) | 6842.8(5) | 5000     | 20.3(3)       | 2   | 2.095  |
| Pb2  | 0         | 5000      | 5000     | 58.6(6)       | 2   | 1.810  |
| S1   | 2350(3)   | 5000      | 5000     | 15.6(2)       | -2  | -1.881 |
| S2   | 1219(3)   | 0         | 0        | 11.4(1)       | -2  | -2.094 |
| S3   | 9138(2)   | 6467(3)   | 0        | 17.2(9)       | -2  | -2.087 |
| S4   | 0         | 1466(4)   | 5000     | 11.8(1)       | -2  | -1.830 |

| Cl1      | 2500      | 7500      | 0        | 18.7(2)       | -1  | -0.903 |
|----------|-----------|-----------|----------|---------------|-----|--------|
| Sn1      | 0         | 0         | 0        | 13.5(5)       | 4   | 3.696  |
| Sn2      | 8348 (8)  | 5000      | 0        | 15.6(4)       | 4   | 3.939  |
| <b>4</b> |           |           |          |               |     |        |
| Atom     | <i>x</i>  | <i>y</i>  | <i>z</i> | <i>U</i> (eq) | FOS | BVS    |
| Pb1      | 3558.9(3) | 1853.0(5) | 0        | 22.7(4)       | 2   | 2.071  |
| Pb2      | 0         | 0         | 10000    | 61.7(7)       | 2   | 1.637  |
| Sn1      | 5000      | 0         | 5000     | 11.4(5)       | 4   | 3.593  |
| Sn2      | 1650.3(7) | 0         | 5000     | 11.8(4)       | 4   | 3.856  |
| Se1      | 5000      | 1503.2(6) | 0        | 10.0(5)       | -2  | -1.797 |
| Se2      | 2391.4(9) | 0         | 0        | 12.1(5)       | -2  | -1.823 |
| Se3      | 4152.5(8) | 3496.7(2) | 5000     | 14.0(4)       | -2  | -2.045 |
| Se4      | 3743.5(1) | 0         | 5000     | 9.8(5)        | -2  | -2.102 |
| Cl1      | 2500      | 2500      | 5000     | 17.4(1)       | -1  | -0.802 |

**Table S2.** Selected bond lengths (Å) of **1-4**.

| <b>1</b> |          |        |          |
|----------|----------|--------|----------|
| bond     | length/Å | bond   | length/Å |
| In1–S1   | 2.515(3) | In3–S3 | 2.562(3) |
| In1–S5   | 2.566(3) | In3–S5 | 2.566(3) |
| In1–S6   | 2.593(3) | In3–S4 | 2.573(3) |
| In1–S2   | 2.677(3) | In3–S4 | 2.717(3) |
| In1–S2   | 2.679(3) | In3–S2 | 2.812(3) |
| In1–S4   | 2.703(3) | In4–S1 | 2.551(3) |
| In2–S6   | 2.408(3) | In4–S3 | 2.567(3) |

|         |          |        |          |
|---------|----------|--------|----------|
| In2–S5  | 2.418(3) | In4–S6 | 2.571(3) |
| In2–S3  | 2.420(3) | In4–S4 | 2.594(3) |
| In2–Cl1 | 2.506(3) | In4–S2 | 2.657(3) |
| In3–S1  | 2.552(3) | In4–S2 | 2.871(3) |

---

**2**

---

| Bond    | Length/Å | Bond   | Length/Å |
|---------|----------|--------|----------|
| In1–S1  | 2.531(4) | In3–S5 | 2.574(4) |
| In1–S2  | 2.561(4) | In3–S4 | 2.586(4) |
| In1–S3  | 2.612(4) | In3–S3 | 2.583(4) |
| In1–S6  | 2.683(4) | In3–S6 | 2.665(4) |
| In1–S3  | 2.706(4) | In3–S6 | 2.868(4) |
| In1–S4  | 2.723(4) | In4–S5 | 2.552(4) |
| In2–S3  | 2.405(4) | In4–S1 | 2.567(4) |
| In2–S2  | 2.423(4) | In4–S4 | 2.579(4) |
| In2–S5  | 2.422(4) | In4–S2 | 2.581(4) |
| In2–Cl1 | 2.519(5) | In4–S4 | 2.740(4) |
| In3–S1  | 2.550(4) | In4–S6 | 2.800(4) |

---

**3**

---

| Bond    | Length/Å | Bond   | Length/Å |
|---------|----------|--------|----------|
| Pb1–S2  | 2.9600   | Sn1–S2 | 2.5126   |
| Pb1–S3  | 3.0180   | Sn1–S4 | 2.6163   |
| Pb1–S4  | 2.9329   | Sn2–S1 | 2.4224   |
| Pb1–Cl1 | 3.0808   | Sn2–S3 | 2.3894   |

---

**4**

---

| Bond    | Length/Å | Bond    | Length/Å |
|---------|----------|---------|----------|
| Pb1–Se1 | 3.0914   | Sn1–Se1 | 2.7383   |
| Pb1–Se3 | 3.1240   | Sn1–Se4 | 2.6692   |



|         |        |         |        |
|---------|--------|---------|--------|
| Pb1-Se4 | 3.0716 | Sn2-Se2 | 2.5584 |
| Pb1-Cl1 | 3.1562 | Sn2-Se3 | 2.5178 |

---
